# Supplementary material for: DGRPool, a web tool leveraging harmonized Drosophila Genetic Reference Panel phenotyping data for the study of complex traits
Source: eLife. 2024 Oct 21;12:RP88981. doi: 10.7554/eLife.88981 (PMC11493408; doi:10.7554/eLife.88981)
Supplement: Supplementary file 1. — This table was created from the ‘studies.tsv’ file, which is downloadable from the front page of DGRPool. It contains all studies and publication references used in the online tool and in this manuscript. [file elife-88981-supp1.xlsx]

## Sheet: studies (1)
Study ID	Study reference	Authors	Title	Journal	Issue	Volume	Year	DOI	Nb phenotypes	Curator's comments	Curator's description	Curator's categorization	Status	FlyBase reference
1	(Arya et al., 2010)	Gunjan H Arya,Allison L Weber,Ping Wang,Michael M Magwire,Yazmin L Serrano Negron,Trudy F C MacKay,Robert R H Anholt	Natural Variation, Functional Pleiotropy and Transcriptional Contexts of <i>Odorant Binding Protein</i> Genes in <i>Drosophila melanogaster</i>	Genetics	4	186	2010	10.1534/genetics.110.123166	5	A theoretical response score >2.5 indicates repulsion, whereas scores <2.5 indicate attraction to the odorant.<br/><br/> Phenotyping data comes from Table S1 in <a href="https://academic.oup.com/genetics/article/186/4/1475/6063705?login=true#supplementary-data">supplementary data</a> section.<br/><br/> Of note, the provided data are summary data (means, sd, cv, ...) across multiple flies from the…	This study evaluated the behavior response of DGRPs to four different odorants (benzaldehyde, acetophenone, hexanol, and hexanal). They also looked at the longevity of these lines.	Ageing,Olfactory,Sensory,Life history traits,Behaviour	curated	FBrf0212597
2	(Arya et al., 2015)	Gunjan H. Arya,Michael M. Magwire,Wen Huang,Yazmin L. Serrano-Negron,Trudy F.C. MacKay,Robert R.H. Anholt	The Genetic Basis for Variation in Olfactory Behavior in <i>Drosophila melanogaster</i>	Chemical Senses	4	40	2015	10.1093/chemse/bjv001	14	The provided data are summary data (means, sd, cv, ...) across multiple flies from the same DGRP line. The raw data per fly is not available.<br/><br/> Phenotyping data is available from Table S1 in <a href="https://academic.oup.com/chemse/article/40/4/233/274077?login=true#supplementary-data">supplementary data</a> section	This is a follow-up study of <a href="https://dgrpool.epfl.ch/studies/2">Arya et al., 2010</a>. Similarly, the authors studied the behavior response of flies to 14 different odorants.	Sensory,Behaviour,Olfactory	curated	FBrf0228128
3	(Battlay et al., 2016)	Paul Battlay,Joshua M Schmidt,Alexandre Fournier-Level,Charles Robin	Genomic and Transcriptomic Associations Identify a New Insecticide Resistance Phenotype for the Selective Sweep at the <i>Cyp6g1</i> Locus of <i>Drosophila melanogaster</i>	G3 Genes|Genomes|Genetics	8	6	2016	10.1534/g3.116.031054	5	The data does not seem to be available anymore from the journal's page.	This study is about resistance to the organophosphate insecticide azinphos-methyl. It identified Cyp6g1, a gene involved in resistance to DDT and neonicotinoid insecticides, as the top candidate for azinphos-methyl resistance, along with four other candidate genes.	Toxicity,Resistance,Metabolism	curated	FBrf0233124
4	(Bou Sleiman et al., 2015)	Maroun S. Bou Sleiman,Dani Osman,Andreas Massouras,Ary A. Hoffmann,Bruno Lemaitre,Bart Deplancke	Genetic, molecular and physiological basis of variation in <i>Drosophila</i> gut immunocompetence	Nature Communications	1	6	2015	10.1038/ncomms8829	2	The phenotyping data (<i>PE</i> resistance) was extracted from the Supplementary Table 1 from the <a href="https://www.nature.com/articles/ncomms8829#Sec22">Supplementary Information</a> file.<br/><br/> The <i>Ecc15</i> resistance data were obtained directly from the authors.	To investigate the determinants underlying inter-individual variation in gut immunocompetence, this study performed enteric infection of 140 Drosophila lines with the entomopathogenic bacterium <i>Pseudomonas entomophila (PE)</i> and observed extensive variation in survival. To determine if this variability in survival is specific to enteric infection, the authors assessed the susceptibility of D…	Immunity,Resistance,Microbiota	curated	FBrf0229120
5	(Brown et al., 2013)	E. B. Brown,J. E. Layne,C. Zhu,A. G. Jegga,S. M. Rollmann	Genome-wide association mapping of natural variation in odour-guided behaviour in <i>Drosophila</i>	Genes, Brain and Behavior	5	12	2013	10.1111/gbb.12048	5	Phenotyping data were extracted from the Supplementary Table S3 in the <a href="https://onlinelibrary.wiley.com/doi/10.1111/gbb.12048#support-information-section">Supporting Information</a> section	This study measured the behavior of flies in the presence of olfactory stimuli, here the odorant 2,3-butanedione, a volatile compound present in fermenting fruit.<br/> To measure this behavior sensitively, the authors specifically designed a high-throughput behavioral assay system for temporal and spatial dynamics of odor-guided behavior.	Sensory,Behaviour,Olfactory	curated	FBrf0222011
6	(Carbone et al., 2016)	Mary Anna Carbone,Akihiko Yamamoto,Wen Huang,Rachel A. Lyman,Tess Brune Meadors,Ryoan Yamamoto,Robert R. H. Anholt,Trudy F. C. MacKay	Genetic architecture of natural variation in visual senescence in <i>Drosophila</i>	Proceedings of the National Academy of Sciences	43	113	2016	10.1073/pnas.1613833113	10	Each individual fly is assigned a score from 1 (did not move toward the light) to 8 (moved toward the light seven times).<br/><br/> Phenotyping data comes from Dataset S1 in file <a href="https://www.pnas.org/doi/suppl/10.1073/pnas.1613833113/suppl_file/pnas.1613833113.sd01.xlsx">pnas.1613833113.sd01.xlsx</a> and Dataset S4 in file <a href="https://www.pnas.org/doi/suppl/10.1073/pnas.1613833113/s…	Study of the age-dependent decline in phototaxis (innate tendency to move toward the light) at 1, 2, and 4 weeks, as a proxy for visual senescence	Sensory,Life history traits,Ageing	curated	FBrf0233864
7	(Chaston et al., 2016)	John M. Chaston,Adam J. Dobson,Peter D. Newell,Angela E. Douglas	Host Genetic Control of the Microbiota Mediates the <i>Drosophila</i> Nutritional Phenotype	Applied and Environmental Microbiology	2	82	2016	10.1128/AEM.03301-15	89	Assignments to taxonomic ranks were performed in QIIME using the <a href="https://journals.asm.org/doi/10.1128/AEM.03006-05">Greengenes</a> database (class, order, family, genus, species). Operational taxonomic units (OTUs) were binned based on QIIME taxonomic assignments during correlation analysis and numbered from OTU001 to OTU176. It resulted in 76 OTUs (thus 76 phenotypes) after filtering.<b…	This study examined the impact of different microbiota on host nutritional indices (glucose, glycogen, triglyceride, and protein contents). Authors created gnotobiotic flies (containing defined microbiota) with different bacteria and found that multiple host genes were statistically associated with the abundance of one bacterium, Acetobacter tropicalis.	Microbiota,Metabolism,Nutrition	curated	FBrf0230551
8	(Chow et al., 2013)	Clement Y Chow,Mariana F Wolfner,Andrew G Clark	Large Neurological Component to Genetic Differences Underlying Biased Sperm Use in <i>Drosophila</i>	Genetics	1	193	2013	10.1534/genetics.112.146357	3	Phenotyping data were extracted from Table S1 in <b>genetics.112.146357-1</b> pdf file from the <a href="https://academic.oup.com/genetics/article/193/1/177/5935230#supplementary-data">Supplementary data</a> section<br/><br/> Gene expression data was used from <a href="http://flyatlas.org/atlas.cgi">FlyAtlas</a> <a href="https://www.nature.com/articles/ng2049">(Chintapalli et al. 2007)</a><br/><b…	This study examines the female factors (and genes) that mediate sperm competition outcomes. Females were tested in double-mating trials, and the amount of progeny was accounted for, especially distinguishing progeny coming from the first vs the second mating (by eye color). One of the lines never engaged in a second mating. Further knockdown studies of three candidate genes (para, Rab2, and Rim) …	Life history traits,Mating,Fecundity	curated	FBrf0220325
9	(Chow et al., 2013)	Clement Y. Chow,Mariana F. Wolfner,Andrew G. Clark	Using natural variation in <i>Drosophila</i> to discover previously unknown endoplasmic reticulum stress genes	Proceedings of the National Academy of Sciences	22	110	2013	10.1073/pnas.1307125110	2	Phenotyping data are available in <a href="https://www.pnas.org/doi/suppl/10.1073/pnas.1307125110/suppl_file/sd01.xlsx">sd01.xlsx</a><br/><br/> Some gene expressions are summarized in <a href="https://www.pnas.org/doi/suppl/10.1073/pnas.1307125110/suppl_file/sd02.xlsx">sd02.xlsx</a> (not included in the phenotypes)	This study measured the survival time in response to tunicamycin-induced endoplasmic reticulum (ER) stress in DGRP lines. Survival time was significantly associated with polymorphisms in candidate genes with known (i.e., Xbp1) and unknown roles in ER stress.	Life history traits,Resistance	curated	FBrf0221713
10	(Dembeck et al., 2015)	Lauren M. Dembeck,Wen Huang,Michael M. Magwire,Faye Lawrence,Richard F. Lyman,Trudy F. C. MacKay	Genetic Architecture of Abdominal Pigmentation in <i>Drosophila melanogaster</i>	PLOS Genetics	5	11	2015	10.1371/journal.pgen.1005163	2	Phenotyping data comes from <a href="https://doi.org/10.1371/journal.pgen.1005163.s007">S1 Table</a> in the <a href="https://journals.plos.org/plosgenetics/article?id=10.1371/journal.pgen.1005163#sec016">Supporting Information</a> section. <br/><br/> We've loaded the raw dataset per sample so that any summary statistics can be recalculated (especially the mean, and standard error that are also av…	This study quantifies the amount of female abdominal pigmentation, as the proportion of melanization on the two most posterior abdominal segments, tergites 5 and 6 (T5, T6). They identified known and novel candidate genes implicated in abdominal pigmentation. Several of these genes are involved in developmental and regulatory pathways, chitin production, cuticle structure, and vesicle formation a…	Appearance	curated	FBrf0228267
11	(Dembeck et al., 2015)	Lauren M Dembeck,Katalin Böröczky,Wen Huang,Coby Schal,Robert R H Anholt,Trudy F C MacKay	Genetic architecture of natural variation in cuticular hydrocarbon composition in <i>Drosophila melanogaster</i>	eLife		4	2015	10.7554/eLife.09861	66	Linear alkanes are referred to by the abbreviation <i>n</i>-Cx, where ‘‘x’’ is the total carbon number. For example, tricosane is designated <i>n</i>-C23.<br /> Methyl-branched alkanes are referred to with a y-Me-Cx prefix, where 'y' is the carbon onto which the methyl group is bound. For example, 9-Me-C23 is a 23 carbon chain with a methyl on the 9th carbon.<br /> For monoenes (z-Cx:1) and diene…	Cuticular HydroCarbons (or CHCs) are the most common fat molecules in the epicuticle. It's a group of long-chain hydrocarbons that are produced and secreted by the epidermis (outer layer of skin) and play an important role in protecting the insect’s body from desiccation in dry habitats. They also serve as chemical signals that mediate social interactions and behavior. This study looks into CHC c…	Anatomy,Appearance	curated	FBrf0230707
12	(Durham et al., 2014)	Mary F. Durham,Michael M. Magwire,Eric A. Stone,Jeff Leips	Genome-wide analysis in <i>Drosophila</i> reveals age-specific effects of SNPs on fitness traits	Nature Communications	1	5	2014	10.1038/ncomms5338	12	Phenotypes loaded here cannot be found on the journal's website.	This study observed the extensive natural variation in lifespan, lifetime fecundity (number of eggs) and age-specific fecundity in mated female fruit flies at different ages (1wk, 3wk, 5wk, and 7wk). The authors conducted a genome-wide analysis to examine the effect of single nucleotide polymorphisms (SNPs) on these phenotypes and found that the impact of these SNPs was age-specific. These findin…	Life history traits,Ageing,Fecundity	curated	FBrf0225589
13	(Garlapow et al., 2015)	Megan E. Garlapow,Wen Huang,Michael T. Yarboro,Kara R. Peterson,Trudy F. C. MacKay	Quantitative Genetics of Food Intake in <i>Drosophila melanogaster</i>	PLOS ONE	9	10	2015	10.1371/journal.pone.0138129	1	Phenotyping data come from the <a href="https://doi.org/10.1371/journal.pone.0138129.s002">S1 Table</a> in the <a href="https://journals.plos.org/plosone/article?id=10.1371/journal.pone.0138129#sec023">Supporting Information</a> section.<br/><br/> We've loaded the raw dataset per sample so that any summary statistics can be recalculated (especially the mean, cv, and variance that are also availab…	This study utilized natural variation in food consumption in the DGRP lines to identify and functionally validate novel genes and a SNP affecting food intake. They also studied the extraordinary sexual dimorphism between male and female lines. Most of the uncovered genes have mammalian orthologs that are implicated in the development of many metabolically related diseases, such as type 2 diabetes…	Behaviour,Metabolism,Nutrition	curated	FBrf0229641
14	(Grubbs et al., 2013)	Nathaniel Grubbs,Megan Leach,Xin Su,Tiffany Petrisko,Juan B. Rosario,James W. Mahaffey	New Components of Drosophila Leg Development Identified through Genome Wide Association Studies	PLoS ONE	4	8	2013	10.1371/journal.pone.0060261	14	Phenotyping data come from <a href="https://doi.org/10.1371/journal.pone.0060261.s003">Table S1</a> in the <a href="https://journals.plos.org/plosone/article?id=10.1371/journal.pone.0060261#s5">Supporting Information</a> section. I've manually separated the table (which has data per fly, with 24 replicates per sex for each line) into T1 (first) and T2 (second thoracic leg) phenotypes.<br/><br/> M…	This study focused on leg and antenna development from imaginal discs. They identified additional genes and genetic pathways involved in leg imaginal disc development. In particular, five genes that, when their function is reduced by RNAi, cause an antenna-to-leg transformation.	Development,Limb Development,Anatomy,Appearance	curated	FBrf0221227
15	(Harbison et al., 2013)	Susan T Harbison,Lenovia J McCoy,Trudy FC MacKay	Genome-wide association study of sleep in <i>Drosophila melanogaster</i>	BMC Genomics	1	14	2013	10.1186/1471-2164-14-281	14	Phenotyping data was downloaded from <b>Additional file 3</b> in <a href="https://bmcgenomics.biomedcentral.com/articles/10.1186/1471-2164-14-281#Sec15">Electronic supplementary material</a> section.<br/><br/> Of note, we only have the average values for each DGRP line, not the results per fly.<br/><br/> <b>Definition:</b> Sleep bouts = sleep naps.	This study studies the sleep duration, the number of sleep bouts or ‘naps’, and the average sleep bout length during the day and night of male and female flies. Genome-wide association (GWA) study of sleep identified candidate single nucleotide polymorphisms (SNPs) associated with differences in the mean as well as the environmental sensitivity of sleep traits. These SNPs typically had sex-specif…	Behaviour,Sleep	curated	FBrf0221487
16	(Howick et al., 2017)	Virginia M. Howick,Brian P. Lazzaro	The genetic architecture of defence as resistance to and tolerance of bacterial infection in <i>Drosophila melanogaster</i>	Molecular Ecology	6	26	2017	10.1111/mec.14017	5	Phenotyping data were extracted from the <b>Table S1</b> in the <a href="https://onlinelibrary.wiley.com/doi/10.1111/mec.14017#support-information-section">Supporting Information</a> section.<br/><br/> The definition of <b>"Tolerance"</b> and how it is calculated in this study is explained in the first Result section of the paper.	Defense against pathogenic infection can take two forms: resistance and tolerance. Resistance is the ability of the host to limit a pathogen burden, whereas tolerance is the ability to limit the negative consequences of infection at a given level of infection intensity. This study performed a genomewide association study to map the genetic basis of variation in resistance to and tolerance of infe…	Immunity,Resistance	curated	FBrf0235063
17	(Huang et al., 2014)	Wen Huang,Andreas Massouras,Yutaka Inoue,Jason Peiffer,Miquel Ràmia,Aaron M. Tarone,Lavanya Turlapati,Thomas Zichner,Dianhui Zhu,Richard F. Lyman,Michael M. Magwire,Kerstin Blankenburg,Mary Anna Carbone,Kyle Chang,Lisa L. Ellis,Sonia Fernandez,Yi Han,Gareth Highnam,Carl E. Hjelmen,John R. Jack,Mehwish Javaid,Joy Jayaseelan,Divya Kalra,Sandy Lee,Lora Lewis,Mala Munidasa,Fiona Ongeri,Shohba Patel,L…	Natural variation in genome architecture among 205 <i>Drosophila melanogaster</i> Genetic Reference Panel lines	Genome Research	7	24	2014	10.1101/gr.171546.113	34	This paper is one of the founding papers for the DGRP lines, along with the main study: <a href="https://dgrpool.epfl.ch/studies/21">(MacKay et al, 2012)</a>. <br/><br/> Many of the phenotypes described there are used as covariates for GWAS analyses (Wolbachia status, Large Chromosomal inversion). This is the case on this website or for e.g. in the <a href="http://dgrp2.gnets.ncsu.edu/">DGRP2 web…	This study produced the genotyping data for the main 205 genotyped DGRP lines. Afterward, the authors mainly focused on genome architecture and population genetics traits such as inversion landscape, or relatedness of the DGRP lines (which mainly comes from the inversions), or variations in genome sizes. The authors also measured <i>Wolbachia pipientis</i> infection status, which extends the meas…	Genome architecture,Microbiota	curated	FBrf0225536
18	(Ivanov et al., 2015)	Dobril K. Ivanov,Valentina Escott-Price,Matthias Ziehm,Michael M. Magwire,Trudy F. C. MacKay,Linda Partridge,Janet M. Thornton	Longevity GWAS Using the <i>Drosophila</i> Genetic Reference Panel	The Journals of Gerontology Series A: Biological Sciences and Medical Sciences	12	70	2015	10.1093/gerona/glv047	4	Data were extracted from the <b>Supplementary Table 1</b> in the <a href=https://academic.oup.com/biomedgerontology/article/70/12/1470/2605217?login=false#supplementary-data>Supplementary data</a> section.<br/><br/> Of note, part of the lifespan data is coming from another study: <a href="https://dgrpool.epfl.ch/studies/1">(Arya et al, 2010)</a><br/><br/> The Wolbachia infection status is a binar…	This study measured the lifespan of virgin females. Genes in the target of the rapamycin pathway or carbohydrate metabolism seem to be associated with lifespan; including the InterPro term DUF227, which has been previously associated with lifespan determination.	Ageing	curated	FBrf0230043
19	(Jordan et al., 2012)	Katherine W. Jordan,Kyle L. Craver,Michael M. Magwire,Carmen E. Cubilla,Trudy F. C. MacKay,Robert R. H. Anholt	Genome-Wide Association for Sensitivity to Chronic Oxidative Stress in <i>Drosophila melanogaster</i>	PLoS ONE	6	7	2012	10.1371/journal.pone.0038722	4	Phenotyping data were extracted from <a href="https://doi.org/10.1371/journal.pone.0038722.s006">Table S1</a> in the <a href="https://journals.plos.org/plosone/article?id=10.1371/journal.pone.0038722#s5">Supporting information</a> section.<br/><br/> For the geotaxis assay, each fly received a score for the highest point reached during the assay period according to 26 divisions of 5mm each so that…	This study investigates the age-related locomotor impairment caused by reactive oxygen species (ROS), a common byproduct of mitochondrial energy metabolism, which can also be induced by exogenous sources, including UV light, radiation, and environmental toxins. Here, the authors assessed the locomotion of aged flies on standard medium and following chronic exposure to medium supplemented with 3 m…	Life history traits,Resistance,Locomotion,Ageing	curated	FBrf0218606
20	(Katzenberger et al., 2015)	Rebeccah J Katzenberger,Stanislava Chtarbanova,Stacey A Rimkus,Julie A Fischer,Gulpreet Kaur,Jocelyn M Seppala,Laura C Swanson,Jocelyn E Zajac,Barry Ganetzky,David A Wassarman	Death following traumatic brain injury in <i>Drosophila</i> is associated with intestinal barrier dysfunction	eLife		4	2015	10.7554/eLife.04790	2	The Mortality Index at 24hr (MI<sub>24</sub>) represents the average percent death for flies with injuries minus the average percent death for flies without injuries.<br/><br/> Phenotyping data comes from the <a href="https://doi.org/10.7554/eLife.04790.020">Supplementary file 1</a> in the <a href="https://elifesciences.org/articles/04790/figures#files">Additional files</a> section.	This study evaluated the probability of death following traumatic brain injury (TBI). TBI causes intestinal and blood–brain barrier dysfunction and intestinal barrier dysfunction is highly correlated with the probability of death. Furthermore, the authors found that ingestion of glucose after a primary injury increases the probability of death through a secondary injury mechanism that exacerbates…	Life history traits,Resistance	curated	FBrf0227948
21	(MacKay et al., 2012)	Trudy F. C. MacKay,Stephen Richards,Eric A. Stone,Antonio Barbadilla,Julien F. Ayroles,Dianhui Zhu,Sònia Casillas,Yi Han,Michael M. Magwire,Julie M. Cridland,Mark F. Richardson,Robert R. H. Anholt,Maite Barrón,Crystal Bess,Kerstin Petra Blankenburg,Mary Anna Carbone,David Castellano,Lesley Chaboub,Laura Duncan,Zeke Harris,Mehwish Javaid,Joy Christina Jayaseelan,Shalini N. Jhangiani,Katherine W. J…	The <i>Drosophila melanogaster</i> Genetic Reference Panel	Nature	7384	482	2012	10.1038/nature10811	19	This paper is the founding paper for the DGRP lines, along with the extended genotyping study: <a href="https://dgrpool.epfl.ch/studies/17">(Huang et al, 2014)</a>.<br/><br/> Phenotyping data were extracted from the <b>Supplementary Tables</b> pdf file, found in the <a href="https://www.nature.com/articles/nature10811#Sec12">Supplementary information</a> section. It contained the following phenot…	This is the founding paper of the <i>Drosophila melanogaster</i> Genetic Reference Panel (DGRP) lines. It contains the original 192 inbred DGRP lines derived from a single outbred population, that were later extended. It also contains the original genotyping that was performed on 168 lines, and later extended to 205 lines <a href="https://dgrpool.epfl.ch/studies/17">(Huang et al, 2014)</a>. They …	Behaviour,Resistance,Locomotion,Microbiota	curated	FBrf0217434
22	(Mitchell et al., 2017)	Chelsea L. Mitchell,Catrina E. Latuszek,Kara R. Vogel,Ian M. Greenlund,Rebecca E. Hobmeier,Olivia K. Ingram,Shannon R. Dufek,Jared L. Pecore,Felicia R. Nip,Zachary J. Johnson,Xiaohui Ji,Hairong Wei,Oliver Gailing,Thomas Werner	α-amanitin resistance in <i>Drosophila melanogaster</i>: A genome-wide association approach	PLOS ONE	2	12	2017	10.1371/journal.pone.0173162	3	Phenotyping data were found in the <a href="https://doi.org/10.1371/journal.pone.0173162.s001">S1 Table</a> and the <a href="https://doi.org/10.1371/journal.pone.0173162.s002">S2 Table</a>, in the <a href="https://journals.plos.org/plosone/article?id=10.1371/journal.pone.0173162#sec017">Supporting information</a> section.<br/><br/> The phenotypes were measured as the fraction of larvae emerging a…	This study tested the mushroom toxin (α-amanitin) resistance of <i>D. melanogaster</i>. While these flies tend to avoid mushrooms in nature, some DGRP lines are surprisingly resistant to α-amanitin. This resistance may represent a pre-adaptation, which might enable this species to invade the mushroom niche in the future. Genes linked to this resistance seem linked to the Target of Rapamycin (TOR)…	Toxicity,Resistance	curated	FBrf0234898
23	(Montgomery et al., 2014)	Sara L. Montgomery,Daria Vorojeikina,Wen Huang,Trudy F. C. MacKay,Robert R. H. Anholt,Matthew D. Rand	Genome-Wide Association Analysis of Tolerance to Methylmercury Toxicity in <i>Drosophila</i> Implicates Myogenic and Neuromuscular Developmental Pathways	PLoS ONE	10	9	2014	10.1371/journal.pone.0110375	11	The development of flies exposed to MeHg during larval and pupal stages was measured by scoring eclosion (adult hatching) as a phenotypic endpoint.<br/> The eclosion index was calculated by normalizing the mean eclosion rate for each MeHg concentration to the eclosion on 0 µM MeHg for each strain.<br/> The cumulative eclosion index was generated by summing the normalized percent eclosion values o…	Methylmercury (MeHg) is a persistent environmental toxin present in seafood that can compromise the developing nervous system in humans. This study examined how genetic variation impacts MeHg tolerance, by assessing developmental tolerance (measured by eclosion rate) to different MeHg concentrations. In addition, the development of MeHg food supplemented with caffeine, a previously identified die…	Toxicity,Resistance,Fecundity	curated	FBrf0226648
24	(Morgante et al., 2015)	Fabio Morgante,Peter Sørensen,Daniel A. Sorensen,Christian Maltecca,Trudy F. C. MacKay	Genetic Architecture of Micro-Environmental Plasticity in <i>Drosophila melanogaster</i>	Scientific Reports	1	5	2015	10.1038/srep09785	9	Phenotyping data were extracted from <b>Supplementary Data file S1</b> found in the <a href="https://www.nature.com/articles/srep09785#Sec15">Electronic supplementary material</a> section.<br/><br/> The average phenotype values are identical to the ones in <a href="https://dgrpool.epfl.ch/studies/21">(MacKay et al., 2012)</a> for all three phenotypes (resistance to starvation stress, chill coma r…	This study proposes a new measure for micro-environmental plasticity, as the natural logarithm of the within-line standard deviation ln(σE). They test their values in the context of three traits: resistance to starvation stress, chill coma recovery time, and startle response which were measured in <a href="https://dgrpool.epfl.ch/studies/21">(MacKay et al., 2012)</a>.	Behaviour,Resistance,Locomotion	curated	FBrf0228381
25	(Morozova et al., 2015)	Tatiana V. Morozova,Wen Huang,Victoria A. Pray,Thomas Whitham,Robert R. H. Anholt,Trudy F. C. MacKay	Polymorphisms in early neurodevelopmental genes affect natural variation in alcohol sensitivity in adult drosophila	BMC Genomics	1	16	2015	10.1186/s12864-015-2064-5	6	Phenotyping data were downloaded from the <b>Additional file 2</b> (Data file S1) in the <a href="https://bmcgenomics.biomedcentral.com/articles/10.1186/s12864-015-2064-5#Sec20">Additional files</a> section.<br/><br/> Alcohol knockdown time (Mean Elution Time, MET) was measured after a single (acute) alcohol exposure (E1), and after a second exposure (E2) following a 2 h recovery period, separate…	This study explores the genetic basis of natural variation in alcohol sensitivity and tolerance. Individual variation in alcohol sensitivity in Drosophila is highly polygenic and in part determined by variation in evolutionarily conserved signaling pathways that are associated with catecholamine neurotransmitter biosynthesis and early development of the nervous system.	Toxicity,Resistance,Metabolism	curated	FBrf0229987
26	(Najarro et al., 2015)	Michael A. Najarro,Jennifer L. Hackett,Brittny R. Smith,Chad A. Highfill,Elizabeth G. King,Anthony D. Long,Stuart J. MacDonald	Identifying Loci Contributing to Natural Variation in Xenobiotic Resistance in <i>Drosophila</i>	PLOS Genetics	11	11	2015	10.1371/journal.pgen.1005663	1	Phenotyping data was taken from the <a href="https://doi.org/10.1371/journal.pgen.1005663.s015">S5 Table</a> in the <a href="https://journals.plos.org/plosgenetics/article?id=10.1371/journal.pgen.1005663#sec019">Supporting information</a> section.<br/><br/> <b>Of note</b>, this study uses both flies from the DGRP and flies from another set of Recombinant Inbred Lines (RILs) called DSPR. Of course…	Living organisms are subjected to a barrage of toxic compounds, or xenobiotics, in their environment and their diet. Natural populations exhibit a great deal of interindividual genetic variation in the response to toxins, exemplified by the variable clinical efficacy of pharmaceutical drugs in humans, and the evolution of pesticide-resistant insects. This study measured xenobiotic resistance, usi…	Toxicity,Resistance	curated	FBrf0230275
27	(Najarro et al., 2017)	Michael A Najarro,Jennifer L Hackett,Stuart J MacDonald	Loci Contributing to Boric Acid Toxicity in Two Reference Populations of <i>Drosophila melanogaster</i>	G3 Genes|Genomes|Genetics	6	7	2017	10.1534/g3.117.041418	1	Phenotyping data are no longer available on the journal's website. Data came from <b>Data S1</b> file.<br/><br/> The measure of resistance to boric acid is taken as the lifespan (in hours) of mated females exposed to media supplemented with 1.5% boric acid.<br/><br/> <b>Of note</b>, this study uses both flies from the DGRP and flies from another set of Recombinant Inbred Lines (RILs) called DSPR.…	This study measured the resistance to boric acid, a commonly-used household insecticide.	Toxicity,Resistance	curated	FBrf0235744
28	(Richardson et al., 2012)	Mark F. Richardson,Lucy A. Weinert,John J. Welch,Raquel S. Linheiro,Michael M. Magwire,Francis M. Jiggins,Casey M. Bergman	Population Genomics of the <i>Wolbachia</i> Endosymbiont in <i>Drosophila melanogaster</i>	PLoS Genetics	12	8	2012	10.1371/journal.pgen.1003129	23	Phenotyping data comes from <a href="https://doi.org/10.1371/journal.pgen.1003129.s001">Dataset S1</a> in the <a href="https://journals.plos.org/plosgenetics/article?id=10.1371/journal.pgen.1003129#s5">Supporting information</a> section.<br/><br/> <b>Of note</b>, this study uses both flies from the DGRP (174 lines) and flies from the Drosophila Population Genomics Project (DPGP). Of course, we on…	This study provides a complete genomic analysis of the evolutionary mode and temporal dynamics of the <i>Drosophila melanogaster–Wolbachia</i> symbiosis. The authors used whole-genome resequencing data from 290 lines to predict <i>Wolbachia</i> infection status, estimate relative cytoplasmic genome copy number, and reconstruct <i>Wolbachia</i> and mitochondrial genome sequences. Overall, 63% of <…	Genome architecture,Immunity,Microbiota	curated	FBrf0220355
29	(Rohde et al., 2017)	Palle Duun Rohde,Bryn Gaertner,Kirsty Ward,Peter Sørensen,Trudy F C MacKay	Genomic Analysis of Genotype-by-Social Environment Interaction for <i>Drosophila melanogaster</i> Aggressive Behavior	Genetics	4	206	2017	10.1534/genetics.117.200642	7	Phenotyping data were extracted from <b>Table S1</b> in the <a href="https://academic.oup.com/genetics/article/206/4/1969/6072640#supplementary-data">Supplementary data</a> section.<br/><br/> A behavioral arena, the <b>Flydiator arena</b> [<i>sic</i>], was developed to facilitate high-throughput acquisition of aggression data on pairs of individuals; one DGRP and one control fly (CSB).	This study investigated the genetic basis of variation in male aggressive behavior for flies reared in a socialized and socially isolated environment. A large proportion of associated genes have previously been associated with aggressive behavior in Drosophila and mice, and have human orthologs that have been associated with neurological disorders, indicating partially shared genetic mechanisms u…	Behaviour	curated	FBrf0236263
30	(Shorter et al., 2015)	John Shorter,Charlene Couch,Wen Huang,Mary Anna Carbone,Jason Peiffer,Robert R. H. Anholt,Trudy F. C. MacKay	Genetic architecture of natural variation in <i>Drosophila melanogaster</i> aggressive behavior	Proceedings of the National Academy of Sciences	27	112	2015	10.1073/pnas.1510104112	1	Phenotyping data are coming from <b>Dataset S1</b> in the <a href="https://www.pnas.org/doi/full/10.1073/pnas.1510104112#supplementary-materials">Supporting information</a> section.<br/><br/> The authors quantified aggressive behavior for groups of eight flies of the same genotype (“eight fly” assay) or of a single focal fly and seven flies of a different genotype (“focal fly” assay), as previous…	With the exception of genetic variants associated with bioamine signaling, which have been implicated in aggression in many species, the genetic basis of natural variation in aggression is largely unknown. This study identified genes that have been previously involved in aggressive behavior as well as many novel loci, including gustatory receptor 63a (Gr63a), which encodes a subunit of the recept…	Behaviour	curated	FBrf0228967
31	(Srivastav et al., 2017)	Satyam P Srivastav,Erin S Kelleher	Paternal Induction of Hybrid Dysgenesis in <i>Drosophila melanogaster</i> Is Weakly Correlated with Both <i>P</i>-Element and <i>hobo</i> Element Dosage	G3 Genes|Genomes|Genetics	5	7	2017	10.1534/g3.117.040634	36	The phenotyping data is no longer available from the journal's website.<br/><br/> The phenotyping data are a bit redundant/correlated since the authors tested 6 different pipelines to estimate the structural variation of Full Length (<i>FL</i>) and <i>KP</i> structural variations in <i>P</i>-Elements, and two pipelines to estimate the structural variation of Full Length (<i>FL</i>) and <i>CN</i> …	Transposable elements (TEs) produce specific deleterious mutations by insertional inactivation, inducing DNA damage and participating in ectopic recombination. These effects are often assumed to be dosage-dependent, with stronger effects occurring in the presence of higher TE copy numbers. The authors tested this assumption by considering the relationship between the copy number of two active DNA…	Genome architecture	curated	FBrf0235441
32	(Unckless et al., 2015)	Robert L Unckless,Susan M Rottschaefer,Brian P Lazzaro	A Genome-Wide Association Study for Nutritional Indices in <i>Drosophila</i>	G3 Genes|Genomes|Genetics	3	5	2015	10.1534/g3.114.016477	28	Phenotyping data comes from <b>Table S2</b> in the <a href="https://academic.oup.com/g3journal/article/5/3/417/6058726?login=true#supplementary-data">Supplementary data</a> section.	The quality of dietary nutrition and the assimilation of dietary nutrients have a significant influence on many traits, including lifespan, development, reproduction, and immunity. This study searched for genetic associations with several nutritional indices (total soluble protein, glucose, glycogen, free glycerol, triglycerides, and wet weight) measured after rearing on either a low-glucose diet…	Life history traits,Metabolism,Nutrition	curated	FBrf0227710
33	(Vaisnav et al., 2014)	Mahesh Vaisnav,Chao Xing,Hung-Chih Ku,Daniel Hwang,Strahinja Stojadinovic,Alexander Pertsemlidis,John M. Abrams	Genome-Wide Association Analysis of Radiation Resistance in <i>Drosophila melanogaster</i>	PLoS ONE	8	9	2014	10.1371/journal.pone.0104858	1	Phenotyping data comes from <a href="https://doi.org/10.1371/journal.pone.0104858.s002">Supp. Table S2</a> in the <a href="https://journals.plos.org/plosone/article?id=10.1371/journal.pone.0104858#s5">Supporting information</a> section.<br/><br/> The radiation source was a commercial Cs<sup>137</sup> irradiator emitting 662 keV gamma photons, and the irradiator was calibrated using a PTW N31010 i…	Ionizing radiation is genotoxic to cells. Healthy tissue toxicity in patients and radiation resistance in tumors present common clinical challenges in delivering effective radiation therapies. Radiation response is a complex, polygenic trait with unknown genetic determinants. This study investigated the genetics of natural variation for sensitivity to radiation, among which 92 radiosensitive line…	Resistance	curated	FBrf0225939
34	(Vonesch et al., 2016)	Sibylle Chantal Vonesch,David Lamparter,Trudy F. C. MacKay,Sven Bergmann,Ernst Hafen	Genome-Wide Analysis Reveals Novel Regulators of Growth in <i>Drosophila melanogaster</i>	PLOS Genetics	1	12	2016	10.1371/journal.pgen.1005616	27	Raw phenotypic data comes from <a href="https://doi.org/10.1371/journal.pgen.1005616.s013">Table S2</a> in the <a href="https://journals.plos.org/plosgenetics/article?id=10.1371/journal.pgen.1005616#sec028">Supporting information</a> section.<br/><br/> Centroid size was measured as the square root of the summed squared distances of 14 landmarks from the center of the wing. The interocular distanc…	This study performed GWA of organismal size traits and found that the top associated variants differ between traits and sexes, and can only be linked to canonical growth pathway genes by epistasis analysis. The results of this study identified a cluster of associations close to the <i>kek1</i> locus, a well-characterized growth regulator.	Organ Size,Anatomy,Appearance	curated	FBrf0230608
35	(Wang et al., 2017)	Jonathan B. Wang,Hsiao-Ling Lu,Raymond J. St. Leger	The genetic basis for variation in resistance to infection in the <i>Drosophila melanogaster</i> genetic reference panel	PLOS Pathogens	3	13	2017	10.1371/journal.ppat.1006260	2	Phenotyping data were extracted from <a href="https://doi.org/10.1371/journal.ppat.1006260.s001">Table S1</a> found in the <a href="https://journals.plos.org/plospathogens/article?id=10.1371/journal.ppat.1006260#sec022">Supporting information</a> section.<br/><br/> Some phenotypes, such as average survival time (see Figure 6-7) are not available, so these figures are not reproducible.<br/><br/> <…	The authors studied the resistance and tolerance to the fungal pathogen <i>Metarhizium anisopliae</i> Ma549. In addition, they found that host defense to Ma549 was correlated with defense to the bacterium <i>Pseudomonas aeruginosa</i> Pa14, and several previously published DGRP phenotypes including oxidative stress sensitivity, starvation stress resistance, hemolymph glucose levels, and sleep ind…	Immunity,Resistance	curated	FBrf0235068
36	(Weber et al., 2012)	Allison L. Weber,George F. Khan,Michael M. Magwire,Crystal L. Tabor,Trudy F. C. MacKay,Robert R. H. Anholt	Genome-Wide Association Analysis of Oxidative Stress Resistance in <i>Drosophila melanogaster</i>	PLoS ONE	4	7	2012	10.1371/journal.pone.0034745	2	Phenotyping data were extracted from <a href="https://doi.org/10.1371/journal.pone.0034745.s001">Table S1</a> found in the <a href="https://journals.plos.org/plosone/article?id=10.1371/journal.pone.0034745#s5">Supporting information</a> section.	Oxidative stress, or the overabundance of reactive oxygen species (ROS), is an unavoidable consequence of aerobic respiration. It has been implicated in aging, neurodegenerative and cardiovascular disease and the disruption of cell signaling processes that control cell growth and death. This paper studies acute oxidative stress resistance to two oxidizing agents, paraquat and menadione sodium bis…	Resistance	curated	FBrf0218073
37	(Zhou et al., 2016)	Shanshan Zhou,Tatiana V. Morozova,Yasmeen N. Hussain,Sarah E. Luoma,Lenovia McCoy,Akihiko Yamamoto,Trudy F.C. MacKay,Robert R.H. Anholt	The Genetic Basis for Variation in Sensitivity to Lead Toxicity in <i>Drosophila melanogaster</i>	Environmental Health Perspectives	7	124	2016	10.1289/ehp.1510513	8	Phenotyping data was downloaded from <b>Excel File S5</b> in the Zip file found in the <a href="https://ehp.niehs.nih.gov/doi/suppl/10.1289/ehp.1510513">Supplemental material</a> section.<br/><br/> <b>Of note</b>, all phenotyping data are qualitative, not quantitative. Quantitative data are not available on the journal's website. But we asked and received the quantitative data from the authors of…	Heavy metal toxicity is a worldwide health problem, and lead exposure, especially, is of concern due to the adverse effects of low concentrations on cognitive development in children. The aim of this study was to identify evolutionarily conserved candidate genes associated with individual variation in susceptibility to lead exposure. They measured the effects of lead exposure on development time,…	Toxicity,Life history traits	curated	FBrf0233045
38	(Zwarts et al., 2015)	Liesbeth Zwarts,Lies Vanden Broeck,Elisa Cappuyns,Julien F. Ayroles,Michael M. Magwire,Veerle Vulsteke,Jason Clements,Trudy F. C. MacKay,Patrick Callaerts	The genetic basis of natural variation in mushroom body size in <i>Drosophila melanogaster</i>	Nature Communications	1	6	2015	10.1038/ncomms10115	11	Phenotyping data can be downloaded from the <b>Supplementary Data 1</b> file found in the <a href="https://www.nature.com/articles/ncomms10115#Sec16">Supplementary information</a> section.<br/><br/> The authors also compared their phenotypes, with phenotypes from other studies: aggressive behaviour, copulation latency, fitness, startle response, ethanol resistance, starvation resistance, lifespan…	The mammalian cerebral cortex and the insect mushroom bodies (MBs) are key higher-order brain centers for the integration and processing of sensory information. The size of the cerebral cortex and the MBs has been regarded as a proxy for cognitive ability and behavioral plasticity. Here the authors mapped variants affecting natural variation in mushroom body morphology and identified 139 genes an…	Organ Size,Anatomy,Behaviour	curated	FBrf0230412
39	(Harbison et al., 2018)	Susan T. Harbison,Shailesh Kumar,Wen Huang,Lenovia J. McCoy,Kirklin R. Smith,Trudy F. C. MacKay	Genome-Wide Association Study of Circadian Behavior in <i>Drosophila melanogaster</i>	Behavior Genetics	1	49	2018	10.1007/s10519-018-9932-0	3	Phenotyping data comes from <b>Table S2</b> found in the <b>Supplementary material 3</b> of the <a href="https://link.springer.com/article/10.1007/s10519-018-9932-0#Sec25">Electronic Supplementary Material</a> section.<br/><br/> <b>Table S12</b> contains some gene expression data for one DGRP line, but the data seem not deposited in SRA or a gene expression repository. Thus, this data is not incl…	Circadian rhythms influence physiological processes from sleep–wake cycles to body temperature and are controlled by highly conserved cycling molecules. The authors measured the circadian period (Ʈ) and rhythmicity index in the DGRP. Seven DGRP lines had sexually dimorphic arrhythmicity and one line had an exceptionally long circadian period Ʈ.	Behaviour,Life history traits,Sleep	curated	FBrf0241121
40	(Huang et al., 2020)	Wen Huang,Terry Campbell,Mary Anna Carbone,W. Elizabeth Jones,Desiree Unselt,Robert R. H. Anholt,Trudy F. C. MacKay	Context-dependent genetic architecture of Drosophila life span	PLOS Biology	3	18	2020	10.1371/journal.pbio.3000645	6	Phenotyping data are available from the <a href="https://doi.org/10.1371/journal.pbio.3000645.s001">S1 table</a> found in the <a href="https://journals.plos.org/plosbiology/article?id=10.1371/journal.pbio.3000645#sec019">Supporting information</a> section. <b>Of note</b>, raw data is also available from <a href="https://github.com/qgg-lab/dgrp-lifespan/">GitHub</a>, so we primarily uploaded this …	In this study, the authors quantified variation in life span in males and females reared in 3 thermal environments. Quantitative genetic analyses of life span and the micro-environmental variance of life span in the DGRP revealed significant genetic variance for both traits within each sex and environment, as well as significant genotype-by-sex interaction (GSI) and genotype-by-environment intera…	Evolution,Life history traits,Ageing	curated	FBrf0245198
41	(Watanabe et al., 2021)	Louis P. Watanabe,Nicole C. Riddle	Exercise-induced changes in climbing performance	Royal Society Open Science	11	8	2021	10.1098/rsos.211275	2	Phenotyping data were extracted from <b>Table S1</b>, available on <a href="https://doi.org/10.6084/m9.figshare.c.5696157">Figshare</a>.<br/><br/> The exercise-treated flies were subjected to 2h/day exercise session (exercising in response to rotational stimulation on a Treadwheel), for 5 days. Physical fitness in the exercise-treated and control animals was assayed using a rapid iterative negati…	The authors investigated how the climbing ability changes in response to a regular exercise schedule. They found extensive variation in baseline climbing ability and exercise-induced changes. Climbing ability, and its exercise-induced change, are sex- and genotype-dependent.	Life history traits,Locomotion	curated	FBrf0251956
42	(Hope et al., 2019)	Kevin A. Hope,Daniel Flatten,Peter Cavitch,Ben May,James S. Sutcliffe,Janis O’Donnell,Lawrence T. Reiter	The Drosophila Gene <i>Sulfateless</i> Modulates Autism-Like Behaviors	Frontiers in Genetics		10	2019	10.3389/fgene.2019.00574	6	Mean phenotyping data were downloaded from <b>Supplemental Data 1</b> found in the <a href="https://www.frontiersin.org/articles/10.3389/fgene.2019.00574/full#supplementary-material">Supplementary material</a> section. Of note, we rather used the raw phenotyping data available in <b>Supplemental Data 4</b>.	This study investigates autism spectrum disorder (ASD) risk, through three phenotypes with analogous behavior domains: impaired social communication, social reciprocity and repetitive behaviors or restricted interests. They studied ASD gene orthologs (<i>neurexin 4</i> and <i>neuroligin 2</i>), an intellectual disability (ID) gene homolog (<i>kirre</i>), and a gene encoding a heparan sulfate (HS)…	Behaviour,Life history traits	under curation	FBrf0242954
43	(Rohde et al., 2019)	Palle Duun Rohde,Iben Ravnborg Jensen,Pernille Merete Sarup,Michael Ørsted,Ditte Demontis,Peter Sørensen,Torsten Nygaard Kristensen	Genetic Signatures of Drug Response Variability in <i>Drosophila melanogaster</i>	Genetics	2	213	2019	10.1534/genetics.119.302381	4	The control treatment (SUC) consisted of a 5% sucrose solution (with 5% green food dye) and the MPH treatment was a 5% sucrose solution (with 5% green food dye) containing 1.5 mg ml−1 MPH (Sigma [Sigma Chemical], St. Louis, MO).<br/> Phenotyping data were downloaded from the <b>data_file_S1.csv</b> file accessible in the supplemental material available at <a href="https://doi.org/10.25386/genetic…	This study explores the response to methylphenidate (MPH), a drug used in the treatment of attention-deficit/hyperactivity disorder. The authors exposed DGRPs to MPH and control treatment and observed an increase in locomotor activity in MPH-exposed individuals. Based on the DGRP, they showed that the behavioral response to MPH was strongly genotype-dependent.	Behaviour,Locomotion	curated	FBrf0243724
44	(Zhao et al., 2022)	Xiaqing Zhao,Forrest T. Golic,Benjamin R. Harrison,Meghna Manoj,Elise V. Hoffman,Neta Simon,Richard Johnson,Michael J. MacCoss,Lauren M. McIntyre,Daniel E. L. Promislow	The metabolome as a biomarker of aging in <i>Drosophila melanogaster</i>	Aging Cell	2	21	2022	10.1111/acel.13548	15		This study followed adult cohorts of 20 DGRP strains chosen to represent the breadth of lifespan variation. They phenotyped lifespan, baseline mortality, and rate of aging and associated these parameters with age-specific functional traits including fecundity, climbing activity, and age-specific targeted metabolomic profiles. They show that activity levels and metabolome-wide profiles are strongl…	Behaviour,Life history traits,Ageing	under curation	FBrf0252669
45	(Chi et al., 2021)	Wanhao Chi,Wei Liu,Wenqin Fu,Shengqian Xia,Ellie S. Heckscher,Xiaoxi Zhuang	RNA-binding protein syncrip regulates starvation-induced hyperactivity in adult Drosophila	PLOS Genetics	2	17	2021	10.1371/journal.pgen.1009396	5			Behaviour	under curation	FBrf0248324
46	(Frochaux et al., 2020)	Michael V. Frochaux,Maroun Bou Sleiman,Vincent Gardeux,Riccardo Dainese,Brian Hollis,Maria Litovchenko,Virginie S. Braman,Tommaso Andreani,Dani Osman,Bart Deplancke	cis-regulatory variation modulates susceptibility to enteric infection in the Drosophila genetic reference panel	Genome Biology	1	21	2020	10.1186/s13059-019-1912-z	1			Immunity	under curation	FBrf0244562
47	(Ørsted et al., 2017)	Michael Ørsted,Palle Duun Rohde,Ary Anthony Hoffmann,Peter Sørensen,Torsten Nygaard Kristensen	Environmental variation partitioned into separate heritable components	Evolution	1	72	2017	10.1111/evo.13391	17	Of note, the inversion and <i>Wolbachia pipientis</i> phenotypes are coming from <a href="https://dgrpool.epfl.ch/studies/17">Huang et al, 2014</a>		Genome architecture,Resistance	under curation	FBrf0237717
48	(Lavoy et al., 2018)	Sierra Lavoy,Vinita G Chittoor-Vinod,Clement Y Chow,Ian Martin	Genetic Modifiers of Neurodegeneration in a <i>Drosophila<i> Model of Parkinson’s Disease	Genetics	4	209	2018	10.1534/genetics.118.301119	10			Behaviour	under curation	FBrf0239578
49	(Salvador-Martínez et al., 2017)	Irepan Salvador-Martínez,Marta Coronado-Zamora,David Castellano,Antonio Barbadilla,Isaac Salazar-Ciudad	Mapping Selection within Drosophila melanogaster Embryo’s Anatomy	Molecular Biology and Evolution	1	35	2017	10.1093/molbev/msx266	0			Development,Anatomy,Appearance	under curation	FBrf0237601
50	(Horváth et al., 2016)	Barbara Horváth,Andrea J. Betancourt,Alex T. Kalinka	A novel method for quantifying the rate of embryogenesis uncovers considerable genetic variation for the duration of embryonic development in Drosophila melanogaster	BMC Evolutionary Biology	1	16	2016	10.1186/s12862-016-0776-z	0			Development	under curation	FBrf0233634
51	(Morozova et al., 2018)	Tatiana V Morozova,Yasmeen Hussain,Lenovia J McCoy,Eugenea V Zhirnov,Morgan R Davis,Victoria A Pray,Rachel A Lyman,Laura H Duncan,Anna McMillen,Aiden Jones,Trudy F C MacKay,Robert R H Anholt	A <i>Cyclin E</i>Centered Genetic Network Contributes to Alcohol-Induced Variation in Drosophila Development	G3 Genes|Genomes|Genetics	8	8	2018	10.1534/g3.118.200260	0			Sensory,Development,Behaviour	under curation	FBrf0239702
52	(Litovchenko et al., 2021)	Maria Litovchenko,Antonio C. A. Meireles-Filho,Michael V. Frochaux,Roel P. J. Bevers,Alessio Prunotto,Ane Martin Anduaga,Brian Hollis,Vincent Gardeux,Virginie S. Braman,Julie M. C. Russeil,Sebastian Kadener,Matteo dal Peraro,Bart Deplancke	Extensive tissue-specific expression variation and novel regulators underlying circadian behavior	Science Advances	5	7	2021	10.1126/sciadv.abc3781	0			Behaviour	under curation	FBrf0247917
53	(He et al., 2016)	X. He,S. Zhou,G. E. St. Armour,T. F. C. MacKay,R. R. H. Anholt	Epistatic partners of neurogenic genes modulate Drosophila olfactory behavior	Genes, Brain and Behavior	2	15	2016	10.1111/gbb.12279	3			Behaviour	under curation	FBrf0230854
54	(Francis et al., 2019)	Deanne Francis,Shila Ghazanfar,Essi Havula,James R. Krycer,Alistair Senior,Annabel Y. Minard,Thomas Geddes,Fiona Weiss,Jacqueline Stöckli,Jean Y.H. Yang,David E. James	Genome wide analysis in <i>Drosophila</i> reveals diet by gene interactions and uncovers diet-responsive genes	bioRxiv			2019	10.1101/718304	0			Resistance,Metabolism	under curation
55	(Akhund-Zade et al., 2021)	Jamilla Akhund-Zade,Shraddha Lall,Erika Gajda,Denise Yoon,Julien F Ayroles,Benjamin L de Bivort	Genetic basis of offspring number–body weight tradeoff in <i>Drosophila melanogaster</i>	G3 Genes|Genomes|Genetics	7	11	2021	10.1093/g3journal/jkab129	0			Life history traits	under curation
56	(Campbell et al., 2019)	Jacob B Campbell,Paula F Overby,Alyx E Gray,Hunter C Smith,Jon F Harrison	Genome-Wide Association Analysis of Anoxia Tolerance in <i>Drosophila melanogaster</i>	G3 Genes|Genomes|Genetics	9	9	2019	10.1534/g3.119.400421	3			Resistance	under curation	FBrf0243370
57	(Spierer et al., 2021)	Adam N. Spierer,Jim A. Mossman,Samuel Pattillo Smith,Lorin Crawford,Sohini Ramachandran,David M. Rand	Natural variation in the regulation of neurodevelopmental genes modifies flight performance in Drosophila	PLOS Genetics	3	17	2021	10.1371/journal.pgen.1008887	1			Behaviour	under curation	FBrf0248437
58	(Rodrigues et al., 2022)	Leonor R. Rodrigues,Martyna K. Zwoinska,R. Axel W. Wiberg,Rhonda R. Snook	The genetic basis and adult reproductive consequences of developmental thermal plasticity	Journal of Animal Ecology	6	91	2022	10.1111/1365-2656.13664	18			Life history traits	under curation	FBrf0253732
59	(Lovejoy et al., 2021)	Pamela C. Lovejoy,Kate E. Foley,Melissa M. Conti,Samantha M. Meadows,Christopher Bishop,Anthony C. Fiumera	Genetic basis of susceptibility to low‐dose paraquat and variation between the sexes in <i>Drosophila melanogaster</i>	Molecular Ecology	9	30	2021	10.1111/mec.15878	65			Sensory,Behaviour	under curation	FBrf0248852
60	(Huang et al., 2012)	Wen Huang,Stephen Richards,Mary Anna Carbone,Dianhui Zhu,Robert R. H. Anholt,Julien F. Ayroles,Laura Duncan,Katherine W. Jordan,Faye Lawrence,Michael M. Magwire,Crystal B. Warner,Kerstin Blankenburg,Yi Han,Mehwish Javaid,Joy Jayaseelan,Shalini N. Jhangiani,Donna Muzny,Fiona Ongeri,Lora Perales,Yuan-Qing Wu,Yiqing Zhang,Xiaoyan Zou,Eric A. Stone,Richard A. Gibbs,Trudy F. C. MacKay	Epistasis dominates the genetic architecture of <i>Drosophila</i> quantitative traits	Proceedings of the National Academy of Sciences	39	109	2012	10.1073/pnas.1213423109	0			Life history traits	under curation	FBrf0219551
61	(Dembeck et al., 2015)	Lauren M Dembeck,Wen Huang,Mary Anna Carbone,Trudy F C MacKay	Genetic basis of natural variation in body pigmentation in <i>Drosophila melanogaster</i>	Fly	2	9	2015	10.1080/19336934.2015.1102807	5			Appearance	under curation	FBrf0230671
62	(Swarup et al., 2012)	Shilpa Swarup,Wen Huang,Trudy F. C. MacKay,Robert R. H. Anholt	Analysis of natural variation reveals neurogenetic networks for <i>Drosophila</i> olfactory behavior	Proceedings of the National Academy of Sciences	3	110	2012	10.1073/pnas.1220168110	0			Sensory	under curation	FBrf0220538
63	(Duneau et al., 2018)	David Duneau,Haina Sun,Jonathan Revah,Keri San Miguel,Henry D. Kunerth,Ian V. Caldas,Philipp W. Messer,Jeffrey G. Scott,Nicolas Buchon	Signatures of insecticide selection in the genome of <i>Drosophila melanogaster</i>	bioRxiv			2018	10.1101/287250	15			Resistance	under curation
64	(Morgante et al., 2019)	Fabio Morgante,Wen Huang,Peter Sørensen,Christian Maltecca,Trudy F. C. MacKay	Leveraging multiple layers of data to predict <i>Drosophila</i> complex traits	bioRxiv			2019	10.1101/824896	0				under curation
65	(Wang et al., 2020)	Jonathan B. Wang,Carolyn Elya,Raymond J. St. Leger	Genetic variation for resistance to the specific fly pathogen Entomophthora muscae	Scientific Reports	1	10	2020	10.1038/s41598-020-71262-w	16			Immunity,Resistance	under curation	FBrf0246635
66	(Garud et al., 2021)	Nandita R. Garud,Philipp W. Messer,Dmitri A. Petrov	Detection of hard and soft selective sweeps from Drosophila melanogaster population genomic data	PLOS Genetics	2	17	2021	10.1371/journal.pgen.1009373	0			Genome architecture	under curation	FBrf0248389
67	(Baker et al., 2021)	Brandon M. Baker,Mary Anna Carbone,Wen Huang,Robert R. H. Anholt,Trudy F. C. MacKay	Genetic Basis of Variation in Cocaine and Methamphetamine Consumption in Outbred Populations of <i>Drosophila melanogaster</i>	bioRxiv			2021	10.1101/2021.03.01.433403	0			Sensory,Behaviour	under curation
68	(Zhang et al., 2021)	Wenyu Zhang,Guy R. Reeves,Diethard Tautz	Testing Implications of the Omnigenic Model for the Genetic Analysis of Loci Identified through Genome-wide Association	Current Biology	5	31	2021	10.1016/j.cub.2020.12.023	0			Appearance	under curation	FBrf0248411
69	(Patel et al., 2021)	Sumit P. Patel,Matthew E. Talbert	Identification of genetic modifiers of lifespan on a high sugar diet in the Drosophila Genetic Reference Panel	Heliyon	6	7	2021	10.1016/j.heliyon.2021.e07153	1			Life history traits	under curation	FBrf0249297
70	(Zhang et al., 2020)	Wenyu Zhang,Guy Richard Reeves,Diethard Tautz	Identification of a genetic network for an ecologically relevant behavioural phenotype in <i>Drosophila melanogaster</i>	Molecular Ecology	3	29	2020	10.1111/mec.15341	0			Anatomy	under curation	FBrf0244858
71	(Yanagawa et al., 2020)	Aya Yanagawa,Wen Huang,Akihiko Yamamoto,Ayako Wada-Katsumata,Coby Schal,Trudy F C MacKay	Genetic Basis of Natural Variation in Spontaneous Grooming in <i>Drosophila melanogaster</i>	G3 Genes|Genomes|Genetics	9	10	2020	10.1534/g3.120.401360	0			Behaviour	under curation	FBrf0246612
72	(Knudsen et al., 2020)	Katherine E Knudsen,William R Reid,Traci M Barbour,Laci M Bowes,Juliana Duncan,Elaina Philpott,Samantha Potter,Maxwell J Scott	Genetic Variation and Potential for Resistance Development to the tTA Overexpression Lethal System in Insects	G3 Genes|Genomes|Genetics	4	10	2020	10.1534/g3.120.400990	0			Genome architecture,Life history traits	under curation	FBrf0245357
73	(Rohde et al., 2018)	Palle Duun Rohde,Solveig Østergaard,Torsten Nygaard Kristensen,Peter Sørensen,Volker Loeschcke,Trudy F C MacKay,Pernille Sarup	Functional Validation of Candidate Genes Detected by Genomic Feature Models	G3 Genes|Genomes|Genetics	5	8	2018	10.1534/g3.118.200082	1			Behaviour	under curation	FBrf0238818
74	(Adebambo et al., 2020)	Temitope H. Adebambo,Donald T. Fox,Adebayo A. Otitoloju	Toxicological Study and Genetic Basis of BTEX Susceptibility in Drosophila melanogaster	Frontiers in Genetics		11	2020	10.3389/fgene.2020.594179	0			Development,Resistance	under curation	FBrf0247219
75	(Bou Sleiman et al., 2020)	Maroun Bou Sleiman,Michael Vincent Frochaux,Tommaso Andreani,Dani Osman,Roderic Guigo,Bart Deplancke	Enteric infection induces Lark-mediated intron retention at the 5′ end of Drosophila genes	Genome Biology	1	21	2020	10.1186/s13059-019-1918-6	2			Genome architecture,Immunity	under curation	FBrf0244561
76	(Lafuente et al., 2018)	E Lafuente,D Duneau,P Beldade	Genetic basis of thermal plasticity variation in <i>Drosophila melanogaster</i>body size	bioRxiv			2018	10.1101/268201	3			Appearance	under curation
77	(Ahlers et al., 2019)	Laura R.H. Ahlers,Chasity E. Trammell,Grace F. Carrell,Sophie MacKinnon,Brandi K. Torrevillas,Clement Y. Chow,Shirley Luckhart,Alan G. Goodman	Insulin potentiates JAK/STAT signaling to broadly inhibit flavivirus replication in insect vectors	bioRxiv			2019	10.1101/701714	0			Immunity,Metabolism	under curation
78	(Watanabe et al., 2018)	Louis P. Watanabe,Cameron Gordon,Mina Y. Momeni,Nicole C. Riddle	Genetic networks underlying natural variation in basal and induced activity levels in <i>Drosophila melanogaster</i>	bioRxiv			2018	10.1101/444380	3			Behaviour	under curation
79	(Evangelou et al., 2018)	Amalia Evangelou,Anastasia Ignatiou,Chloi Antoniou,Sofia Kalanidou,Sotiroula Chatzimatthaiou,Gavriella Shianiou,Soteroulla Ellina,Rafaella Athanasiou,Myrofora Panagi,Yiorgos Apidianakis,Chrysoula Pitsouli	Unpredictable effects of the genetic background of transgenic lines in physiological quantitative traits	bioRxiv			2018	10.1101/494419	6			Life history traits,Metabolism	under curation
80	(Dean et al., 2018)	Rebecca Dean,Camille Hammer,Vanessa Higham,Damian K. Dowling	Masculinization of gene expression is associated with male quality in <i>Drosophila melanogaster</i>	Evolution	12	72	2018	10.1111/evo.13618	5			Behaviour,Life history traits	under curation	FBrf0240924
81	(Gao et al., 2017)	Ning Gao,Johannes W R Martini,Zhe Zhang,Xiaolong Yuan,Hao Zhang,Henner Simianer,Jiaqi Li	Incorporating Gene Annotation into Genomic Prediction of Complex Phenotypes	Genetics	2	207	2017	10.1534/genetics.117.300198	0			Sensory,Behaviour,Metabolism	under curation	FBrf0236841
82	(Signor et al., 2017)	Sarah A Signor,Felicia N New,Sergey Nuzhdin	A Large Panel of Drosophila simulans Reveals an Abundance of Common Variants	Genome Biology and Evolution	1	10	2017	10.1093/gbe/evx262	0			Evolution	under curation	FBrf0237786
83	(Schmidt et al., 2017)	Joshua M Schmidt,Paul Battlay,Rebecca S Gledhill-Smith,Robert T Good,Chris Lumb,Alexandre Fournier-Level,Charles Robin	Insights into DDT Resistance from the <i>Drosophila melanogaster<i> Genetic Reference Panel	Genetics	3	207	2017	10.1534/genetics.117.300310	0			Genome architecture,Resistance	under curation	FBrf0237089
84	(Riddle, 2020)	Nicole C. Riddle	Variation in the response to exercise stimulation in Drosophila: marathon runner versus sprinter genotypes	Journal of Experimental Biology			2020	10.1242/jeb.229997	5			Behaviour	under curation	FBrf0246800
85	(Harrison et al., 2020)	Benjamin R. Harrison,Lu Wang,Erika Gajda,Elise V. Hoffman,Brian Y. Chung,Scott D. Pletcher,Daniel Raftery,Daniel E. L. Promislow	The metabolome as a link in the genotype-phenotype map for peroxide resistance in the fruit fly, Drosophila melanogaster	BMC Genomics	1	21	2020	10.1186/s12864-020-6739-1	59			Resistance,Metabolism	under curation	FBrf0245603
86	(Massey et al., 2019)	J. H. Massey,N. Akiyama,T. Bien,K. Dreisewerd,P. J. Wittkopp,J.Y. Yew,A. Takahashi	Pleiotropic effects of <i>ebony</i>and <i>tan</i>on pigmentation and cuticular hydrocarbon composition in <i>Drosophila melanogaster</i>	bioRxiv			2019	10.1101/538090	0			Appearance	under curation
87	(Gabrawy et al., 2019)	Mariann M Gabrawy,Sarah Campbell,Mary Anna Carbone,Tatiana V Morozova,Gunjan H Arya,Lavanya B Turlapati,Jeremy D Walston,Michelle Starz-Gaiano,Logan Everett,Trudy F C MacKay,Jeff Leips,Peter M Abadir	Lisinopril Preserves Physical Resilience and Extends Life Span in a Genotype-Specific Manner in Drosophila melanogaster	The Journals of Gerontology: Series A	12	74	2019	10.1093/gerona/glz152	0			Sensory,Life history traits	under curation	FBrf0244035
88	(Champer et al., 2019)	Jackson Champer,Zhaoxin Wen,Anisha Luthra,Riona Reeves,Joan Chung,Chen Liu,Yoo Lim Lee,Jingxian Liu,Emily Yang,Philipp W Messer,Andrew G Clark	CRISPR Gene Drive Efficiency and Resistance Rate Is Highly Heritable with No Common Genetic Loci of Large Effect	Genetics	1	212	2019	10.1534/genetics.119.302037	0			Genome architecture,Evolution	under curation	FBrf0242214
89	(Bonfini et al., 2021)	Alessandro Bonfini,Adam J Dobson,David Duneau,Jonathan Revah,Xi Liu,Philip Houtz,Nicolas Buchon	Multiscale analysis reveals that diet-dependent midgut plasticity emerges from alterations in both stem cell niche coupling and enterocyte size	eLife		10	2021	10.7554/elife.64125	13			Organ Size,Development,Metabolism	under curation
90	(Manoel et al., 2018)	Airton Leonardo de Oliveira Manoel,Ayman El-Menyar,Ruben Peralta,Hassan Al-Thani	Beta-blockers in Traumatic Brain Injury	Panamerican Journal of Trauma, Critical Care &amp; Emergency Surgery	2	8	2018	10.5005/jp-journals-10030-1241	0				under curation
91	(Kumar et al., 2020)	Shailesh Kumar,Ilker Tunc,Terry R. Tansey,Mehdi Pirooznia,Susan T. Harbison	Identification of Genes Contributing to a Long Circadian Period in <i>Drosophila Melanogaster</i>	Journal of Biological Rhythms	3	36	2020	10.1177/0748730420975946	0			Genome architecture	under curation	FBrf0248902
92	(Guzman et al., 2021)	Rosa M Guzman,Zachary P Howard,Ziying Liu,Ryan D Oliveira,Alisha T Massa,Anders Omsland,Stephen N White,Alan G Goodman	Natural genetic variation in <i>Drosophila melanogaster<i> reveals genes associated with <i>Coxiella burnetii<i> infection	Genetics	3	217	2021	10.1093/genetics/iyab005	0			Immunity	under curation	FBrf0248571
93	(Ma et al., 2019)	Dali Ma,Maroun Bou-Sleiman,Pauline Joncour,Claire-Emmanuelle Indelicato,Michael Frochaux,Virginie Braman,Maria Litovchenko,Gilles Storelli,Bart Deplancke,François Leulier	Commensal Gut Bacteria Buffer the Impact of Host Genetic Variants on <i>Drosophila</i> Developmental Traits under Nutritional Stress	iScience		19	2019	10.1016/j.isci.2019.07.048	0			Development,Limb Development,Appearance	under curation	FBrf0243652
94	(McCracken et al., 2019)	Andrew W McCracken,Gracie Adams,Laura Hartshorne,Mirre J. P. Simons	The hidden costs of dietary restriction: implications for its evolutionary and mechanistic origins	bioRxiv			2019	10.1101/533711	0			Life history traits	under curation
95	(Rohde et al., 2021)	Palle Duun Rohde,Asbjørn Bøcker,Caroline Amalie Bastholm Jensen,Anne Louise Bergstrøm,Morten Ib Juul Madsen,Sandra Læsø Christensen,Steffan Balling Villadsen,Torsten Nygaard Kristensen	Genotype and Trait Specific Responses to Rapamycin Intake in Drosophila melanogaster	Insects	5	12	2021	10.3390/insects12050474	2			Life history traits,Resistance	under curation	FBrf0249203
96	(Hall et al., 2019)	Bethany S. Hall,Yvonne A. Barnett,Jonathan J. Crofts,Nadia Chuzhanova	Identification of novel genes associated with longevity in Drosophila melanogaster - a computational approach	Aging	23	11	2019	10.18632/aging.102527	0			Genome architecture,Life history traits	under curation	FBrf0244333
97	(Pitchers et al., 2019)	William Pitchers,Jessica Nye,Eladio J Márquez,Alycia Kowalski,Ian Dworkin,David Houle	A Multivariate Genome-Wide Association Study of Wing Shape in <i>Drosophila melanogaster</i>	Genetics	4	211	2019	10.1534/genetics.118.301342	0			Limb Development	under curation	FBrf0242020
98	(Green et al., 2018)	Llewellyn Green,Paul Battlay,Alexandre Fournier-Level,Robert T. Good,Charles Robin	<i>Cis</i>and <i>trans</i>-acting variants contribute to survivorship in a naïve <i>Drosophila melanogaster</i>population exposed to ryanoid insecticides	bioRxiv			2018	10.1101/502161	7			Resistance,Metabolism	under curation
99	(Battlay et al., 2018)	Paul Battlay,Pontus B Leblanc,Llewellyn Green,Nandita R Garud,Joshua M Schmidt,Alexandre Fournier-Level,Charles Robin	Structural Variants and Selective Sweep Foci Contribute to Insecticide Resistance in the <i>Drosophila</i>Genetic Reference Panel	G3 Genes|Genomes|Genetics	11	8	2018	10.1534/g3.118.200619	0			Genome architecture,Resistance	under curation	FBrf0240570
100	(Jin et al., 2020)	Kelly Jin,Kenneth A. Wilson,Jennifer N. Beck,Christopher S. Nelson,George W. Brownridge,Benjamin R. Harrison,Danijel Djukovic,Daniel Raftery,Rachel B. Brem,Shiqing Yu,Mathias Drton,Ali Shojaie,Pankaj Kapahi,Daniel Promislow	Genetic and metabolomic architecture of variation in diet restriction-mediated lifespan extension in Drosophila	PLOS Genetics	7	16	2020	10.1371/journal.pgen.1008835	0			Life history traits,Metabolism	under curation	FBrf0246151
101	(Jehrke et al., 2018)	Lisa Jehrke,Fiona A. Stewart,Andrea Droste,Mathias Beller	The impact of genome variation and diet on the metabolic phenotype and microbiome composition of Drosophila melanogaster	Scientific Reports	1	8	2018	10.1038/s41598-018-24542-5	0			Microbiota,Metabolism	under curation	FBrf0238766
102	(Rajpurohit et al., 2018)	Subhash Rajpurohit,Eran Gefen,Alan O. Bergland,Dmitri A. Petrov,Allen G. Gibbs,Paul S. Schmidt	Spatiotemporal dynamics and genome-wide association analysis of desiccation tolerance in <i>Drosophila melanogaster</i>	Molecular Ecology	17	27	2018	10.1111/mec.14814	19			Resistance,Metabolism	under curation	FBrf0239872
103	(Wilson et al., 2020)	Kenneth A. Wilson,Jennifer N. Beck,Christopher S. Nelson,Tyler A. Hilsabeck,Daniel Promislow,Rachel B. Brem,Pankaj Kapahi	GWAS for Lifespan and Decline in Climbing Ability in Flies upon Dietary Restriction Reveal decima as a Mediator of Insulin-like Peptide Production	Current Biology	14	30	2020	10.1016/j.cub.2020.05.020	0			Behaviour,Life history traits,Metabolism	under curation	FBrf0246266
104	(McCracken et al., 2020)	Andrew W. McCracken,Eleanor Buckle,Mirre J. P. Simons	The relationship between longevity and diet is genotype dependent and sensitive to desiccation in <i>Drosophila melanogaster</i>	Journal of Experimental Biology			2020	10.1242/jeb.230185	0			Life history traits	under curation	FBrf0247456
105	(Freda et al., 2019)	Philip J. Freda,Zainab M. Ali,Nicholas Heter,Gregory J. Ragland,Theodore J. Morgan	Stage-specific genotype-by-environment interactions for cold and heat hardiness in Drosophila melanogaster	Heredity	4	123	2019	10.1038/s41437-019-0236-9	6			Development,Resistance	under curation	FBrf0243444
106	(Okada et al., 2019)	Hirokazu Okada,Ryohei Yagi,Vincent Gardeux,Bart Deplancke,Ernst Hafen	Sex‐dependent and sex‐independent regulatory systems of size variation in natural populations	Molecular Systems Biology	11	15	2019	10.15252/msb.20199012	3			Appearance	under curation	FBrf0244128
107	(Rolandi et al., 2018)	Carmen Rolandi,John R. B. Lighton,Gerardo J. de la Vega,Pablo E. Schilman,Julián Mensch	Genetic variation for tolerance to high temperatures in a population of <i>Drosophila melanogaster</i>	Ecology and Evolution	21	8	2018	10.1002/ece3.4409	3			Resistance	under curation	FBrf0240724
108	(Bryant et al., 2020)	Kaeli N. Bryant,Irene L. G. Newton	The Intracellular Symbiont <i>Wolbachia pipientis</i> Enhances Recombination in a Dose-Dependent Manner	Insects	5	11	2020	10.3390/insects11050284	0			Genome architecture	under curation	FBrf0245608
109	(Sharma et al., 2020)	Amit Sharma,Kazutaka Akagi,Blaine Pattavina,Kenneth A. Wilson,Christopher Nelson,Mark Watson,Elie Maksoud,Ayano Harata,Mauricio Ortega,Rachel B. Brem,Pankaj Kapahi	Musashi expression in intestinal stem cells attenuates radiation-induced decline in intestinal permeability and survival in <i>Drosophila</i>	Scientific Reports	1	10	2020	10.1038/s41598-020-75867-z	0			Resistance	under curation	FBrf0247145
110	(Scharenbrock et al., 2020)	Amanda R. Scharenbrock,Hannah J. Schiffman,Zachariah P. G. Olufs,David A. Wassarman,Misha Perouansky	Interactions among Genetic Background, Anesthetic Agent, and Oxygen Concentration Shape Blunt Traumatic Brain Injury Outcomes in <i>Drosophila melanogaster</i>	International Journal of Molecular Sciences	18	21	2020	10.3390/ijms21186926	0			Behaviour	under curation	FBrf0246825
111	(Newell et al., 2020)	Nicole R Newell,Surjyendu Ray,Justin E Dalton,Julia C Fortier,Joyce Y Kao,Peter L Chang,Sergey V Nuzhdin,Michelle N Arbeitman	The <i>Drosophila</i> Post-mating Response: Gene Expression and Behavioral Changes Reveal Perdurance and Variation in Cross-Tissue Interactions	G3 Genes|Genomes|Genetics	3	10	2020	10.1534/g3.119.400963	0			Behaviour	under curation	FBrf0245057
112	(Palu et al., 2020)	Rebecca A S Palu,Hans M Dalton,Clement Y Chow	Decoupling of Apoptosis from Activation of the ER Stress Response by the <i>Drosophila</i> Metallopeptidase <i>superdeath</i>	Genetics	4	214	2020	10.1534/genetics.119.303004	0			Appearance	under curation	FBrf0245428
113	(Davis et al., 2021)	Jacinta Davis,Claire Da Silva Santos,Narda Caudillo Zavala,Nicholas Gans,Daniel Patracuolla,Monica Fehrenbach,Daniel T Babcock	Characterizing dopaminergic neuron vulnerability using genome-wide analysis	Genetics	4	218	2021	10.1093/genetics/iyab081	1			Behaviour	under curation	FBrf0252031
114	(Masson et al., 2020)	Florent Masson,Sandra Calderon-Copete,Fanny Schüpfer,Aurélien Vigneron,Samuel Rommelaere,Mario G. Garcia-Arraez,Juan C. Paredes,Bruno Lemaitre	Blind killing of both male and female <i>Drosophila</i> embryos by a natural variant of the endosymbiotic bacterium <i>Spiroplasma poulsonii</i>	Cellular Microbiology	5	22	2020	10.1111/cmi.13156	0			Development,Life history traits,Immunity	under curation	FBrf0245270
115	(Savola et al., 2021)	Eevi Savola,Clara Montgomery,Fergal M. Waldron,Katy M. Monteith,Pedro Vale,Craig Walling	Testing evolutionary explanations for the lifespan benefit of dietary restriction in fruit flies ( <i>Drosophila melanogaster<i> )	Evolution	2	75	2021	10.1111/evo.14146	0			Life history traits	under curation	FBrf0248261
116	(Siva-Jothy et al., 2021)	Jonathon A. Siva-Jothy,Pedro F. Vale	Dissecting genetic and sex-specific sources of host heterogeneity in pathogen shedding and spread	PLOS Pathogens	1	17	2021	10.1371/journal.ppat.1009196	0			Life history traits,Immunity	under curation	FBrf0247956
117	(Amstutz et al., 2022)	James Amstutz,Amal Khalifa,Rebecca Palu,Kaushara Jahan	Cluster-Based Analysis of Retinitis Pigmentosa Modifiers Using Drosophila Eye Size and Gene Expression Data	Genes	2	13	2022	10.3390/genes13020386	0			Appearance	under curation	FBrf0252765
118	(Schiffman et al., 2020)	Hannah J. Schiffman,Zachariah P.G. Olufs,Michael R. Lasarev,David A. Wassarman,Misha Perouansky	Ageing and genetic background influence anaesthetic effects in a <i>D.melanogaster</i> model of blunt trauma with brain injury†	British Journal of Anaesthesia	1	125	2020	10.1016/j.bja.2020.03.029	0			Life history traits,Ageing	under curation	FBrf0245944
119	(Chen et al., 2018)	Dawn S. Chen,Sofie Y.N. Delbare,Simone L. White,Jessica L. Sitnik,Martik Chatterjee,Elizabeth L. DoBell,Orli D. Weiss,Andrew G. Clark,Mariana F. Wolfner	Female genetic contributions to sperm competition in <i>Drosophila melanogaster</i>	bioRxiv			2018	10.1101/500546	0			Life history traits	under curation
120	(Hoffman et al., 2021)	Jessica M. Hoffman,Sophie K. Dudeck,Heather K. Patterson,Steven N. Austad	Sex, mating and repeatability of <i>Drosophila melanogaster</i> longevity	Royal Society Open Science	8	8	2021	10.1098/rsos.210273	16			Life history traits,Ageing	under curation	FBrf0250359
121	(Siva-Jothy et al., 2019)	Jonathon A. Siva-Jothy,Pedro F. Vale	Viral infection causes sex-specific changes in fruit fly social aggregation behaviour	Biology Letters	9	15	2019	10.1098/rsbl.2019.0344	0			Behaviour	under curation	FBrf0243480
122	(Brown et al., 2020)	Elizabeth B Brown,John E Layne,Alexandra R Elchert,Stephanie M Rollmann	Behavioral and Transcriptional Response to Selection for Olfactory Behavior in <i>Drosophila</i>	G3 Genes|Genomes|Genetics	4	10	2020	10.1534/g3.120.401117	0			Sensory,Behaviour	under curation	FBrf0245363
130	(Ayroles et al., 2009)	Julien F Ayroles,Mary Anna Carbone,Eric A Stone,Katherine W Jordan,Richard F Lyman,Michael M Magwire,Stephanie M Rollmann,Laura H Duncan,Faye Lawrence,Robert R H Anholt,Trudy F C MacKay	Systems genetics of complex traits in Drosophila melanogaster	Nature Genetics	3	41	2009	10.1038/ng.332	0				recently submitted
131	(Morozova et al., 2009)	Tatiana V Morozova,Julien F Ayroles,Katherine W Jordan,Laura H Duncan,Mary Anna Carbone,Richard F Lyman,Eric A Stone,Diddahally R Govindaraju,R Curtis Ellison,Trudy F C MacKay,Robert R H Anholt	Alcohol Sensitivity in Drosophila: Translational Potential of Systems Genetics	Genetics	2	183	2009	10.1534/genetics.109.107490	0				recently submitted
132	(Morozova et al., 2022)	Tatiana V. Morozova,Vijay Shankar,Rebecca A. MacPherson,Trudy F. C. MacKay,Robert R. H. Anholt	Modulation of the Drosophila transcriptome by developmental exposure to alcohol	BMC Genomics	1	23	2022	10.1186/s12864-022-08559-9	0				recently submitted
133	(Palmer et al., 2018)	William H. Palmer,Nathan C. Medd,Philippa M. Beard,Darren J. Obbard	Isolation of a natural DNA virus of Drosophila melanogaster, and characterisation of host resistance and immune responses	PLOS Pathogens	6	14	2018	10.1371/journal.ppat.1007050	0				recently submitted
134	(Saha et al., 2022)	Saswati Saha,Lionel Spinelli,Jaime A Castro Mondragon,Anaïs Kervadec,Michaela Lynott,Laurent Kremmer,Laurence Roder,Sallouha Krifa,Magali Torres,Christine Brun,Georg Vogler,Rolf Bodmer,Alexandre R Colas,Karen Ocorr,Laurent Perrin	Genetic architecture of natural variation of cardiac performance from flies to humans	eLife		11	2022	10.7554/eLife.82459	0				recently submitted
135	(Sidisky et al., 2023)	Jessica M Sidisky,Danielle de Paula Moreira,Meryem Okumus,Russell Caratenuto,Cassidy Drost,Bali Connors,Sarrah Hussain,Stephanie Alkhatib,Daniel T Babcock	Genome-wide analysis reveals novel regulators of synaptic maintenance in <i>Drosophila</i>	Genetics	4	223	2023	10.1093/genetics/iyad025	0				recently submitted
136	(Patlar et al., 2023)	Bahar Patlar,Lauren Fulham,Alberto Civetta	A predominant role of genotypic variation in both expression of sperm competition genes and paternity success in <i>Drosophila melanogaster</i>	Proceedings of the Royal Society B: Biological Sciences	2007	290	2023	10.1098/rspb.2023.1715	0				recently submitted
137	(Özsoy et al., 2021)	Ergi D Özsoy,Murat Yılmaz,Bahar Patlar,Güzin Emecen,Esra Durmaz,Michael M Magwire,Shanshan Zhou,Wen Huang,Robert R H Anholt,Trudy F C MacKay	Epistasis for head morphology in <i>Drosophila melanogaster</i>	G3 Genes|Genomes|Genetics	10	11	2021	10.1093/g3journal/jkab285	0				recently submitted
138	(Wong et al., 2023)	Heidi W S Wong,Luke Holman	Pleiotropic fitness effects across sexes and ages in the <i>Drosophila<i> genome and transcriptome	Evolution			2023	10.1093/evolut/qpad163	0				recently submitted
139	(Cannavò et al., 2016)	Enrico Cannavò,Nils Koelling,Dermot Harnett,David Garfield,Francesco P. Casale,Lucia Ciglar,Hilary E. Gustafson,Rebecca R. Viales,Raquel Marco-Ferreres,Jacob F. Degner,Bingqing Zhao,Oliver Stegle,Ewan Birney,Eileen E. M. Furlong	Genetic variants regulating expression levels and isoform diversity during embryogenesis	Nature	7637	541	2016	10.1038/nature20802	0				recently submitted
140	(Leiva et al., 2023)	Félix P. Leiva,Mauro Santos,Enrico L. Rezende,Wilco C. E. P. Verberk	Intraspecific variation of heat tolerance in a model ectotherm: The role of oxygen, cell size and body size	Functional Ecology			2023	10.1111/1365-2435.14485	0				recently submitted
141	(Leiva et al., 2023)	Félix P. Leiva,Jeroen G. J. Boerrigter,Wilco C. E. P. Verberk	The role of cell size in shaping responses to oxygen and temperature in fruit flies	Functional Ecology	5	37	2023	10.1111/1365-2435.14294	0				recently submitted
142	(Dobson et al., 2015)	Adam J. Dobson,John M. Chaston,Peter D. Newell,Leanne Donahue,Sara L. Hermann,David R. Sannino,Stephanie Westmiller,Adam C.-N. Wong,Andrew G. Clark,Brian P. Lazzaro,Angela E. Douglas	Host genetic determinants of microbiota-dependent nutrition revealed by genome-wide analysis of <i>Drosophila melanogaster</i>	Nature Communications	1	6	2015	10.1038/ncomms7312	1	Despite being a study about microbiota-dependent nutrition, we could not find any other phenotypes than the Wolbachia Status in this study?<br/> <br/> Phenotyping data is available from Supp Table S6 in <a href="https://www.nature.com/articles/ncomms7312#Sec14">supplementary data</a> section.	This study examined the genetic basis for how gut microbiota affect five nutritional traits (weight, protein, lipid, glucose, and glycogen contents) in fruit flies. The authors found significant genotype-dependent variations in these traits when the microbiota were eliminated, identifying specific genetic polymorphisms associated with these variations and validating key genes involved in these mi…	Microbiota,Metabolism,Nutrition	curated
